# Supplementary material for: Gender Differences in the Longitudinal Association between Work-Related Injury and Depression
Source: MDPI journal article supplement (doi:10.3390/ijerph13111077), 2016-11-02
Supplement: s1 [file s1]

# Supplementary Materials: Gender Differences in the Longitudinal Association between Work-Related Injury and Depression

Jaeyoung Kim and Yeongchull Choi

**Table S1.** Association between occupational injury and depression in the MEPS population after excluding participants with low mental health status.

|                             | Male            |            | Female          |            |
|-----------------------------|-----------------|------------|-----------------|------------|
|                             | OR <sup>a</sup> | 95% CI     | OR <sup>a</sup> | 95% CI     |
| Odds of depression          |                 |            |                 |            |
| No occupational injury      | 1.00            |            | 1.00            |            |
| Occupational injury         | 2.26            | 1.49, 3.42 | 1.55            | 1.00, 2.38 |
| Odds of occupational injury |                 |            |                 |            |
| No depression               | 1.00            |            | 1.00            |            |
| depression                  | 1.17            | 0.62, 2.19 | 1.29            | 0.78, 2.14 |

<sup>a</sup>: model was adjusted for age, race, education, family income, health care accessibility, marital status, smoking, obesity, co morbidity, occupational group, work status, and any activity limitation at work, house, or school due to medical condition.

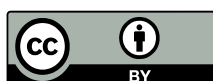

© 2016 by the authors; licensee MDPI, Basel, Switzerland. This article is an open access article distributed under the terms and conditions of the Creative Commons by Attribution (CC-BY) license (<http://creativecommons.org/licenses/by/4.0/>).
